# Supplementary material for: Detection and Survival of SARS-coronavirus in Human Stool, Urine, Wastewater and Sludge
Source: Preprints.org preprint supplement (doi:10.20944/preprints202006.0216.v2), 2020-06-18
Supplement: Supplementary file 1 [file supplementary]

**Detection and survival of SARS in human stool, urine, wastewater and sludge**

**Andrew C Singer*, Rachel Wray**

UK Centre for Ecology & Hydrology, Wallingford, OX10 8BB

**SUPPLEMENTARY MATERIAL**

**Supplementary Table 1: Detection of SARS-CoV-1 from stool and urine.**

| Reference | Sample type: stool/urine/anal swab | CoV Detection (RT-qPCR)  (Data on length of shedding if available) | CoV Detection (RT-PCR)  (Data on length of shedding if available) | Notes | Country |
| --- | --- | --- | --- | --- | --- |
| [(Zhai et al., 2004)](http://sciwheel.com/work/citation?ids=8565621&pre=&suf=&sa=0) | Stool |  | n= 326 patients; n = 326 samples  Days after onset: CoV+ Stool/Total  1-10d: 10/37 (27.0%)  11-20d: 19/71 (26.8%)  21-30d: 12/77 (15.6%)  31-40d: 12/67 (17.9%)  >40d: 7/74 (9.5%)  18% of fecal samples contained SARS-CoV RNA >31–40 days after onset of symptoms | Methods missing, unclear if number of patients equals number of samples or whether people were resampled. | USA, China |
| [(Ren et al., 2003)](http://sciwheel.com/work/citation?ids=8569867&pre=&suf=&sa=0) | Stool |  | n = 46 patients, n = 103 samples  n = 29/46 (63.0%) CoV+  Duration of positive cases 31.76 +/- 10.78 days (12-64 d) | Abstract only | China |
| [(Vabret et al., 2006)](http://sciwheel.com/work/citation?ids=8548163&pre=&suf=&sa=0) | Stool |  | n = 6 patients (5 Children, 1 Adult) n= 6 samples  n = 2/6 (33.3%) CoV+ |  | France |
| [(Peiris et al., 2003)](http://sciwheel.com/work/citation?ids=3887061&pre=&suf=&sa=0) | Stool &  Urine |  | n = 75 patients, n= 67 samples  Stool: 65/67 (97.0%) CoV+ on day 14  Urine: 31/74 (41.9%) CoV+ on day 14 |  | China |
| [(Poon et al., 2004)](http://sciwheel.com/work/citation?ids=8535508&pre=&suf=&sa=0) | Stool | Subsample of 37 seropositive patients compared RT-qPCR & PCR  n = 37 samples  n = 26/37 (70%) CoV+  Days after onset: CoV+/Total  1–3 : 4/6 (66.7%)  4–6 : 12/15 (80.0%)  7–10: 10/16 (62.5%) | n = 44 samples from seropositive CoV+ patients  n = 25/44 (56.8%) CoV+  Days after onset: CoV+/Total (ORF1b region)  1–3 : 2/8 (25.0%)  4–6 : 10/17(58.8%)  7–10: 13/19 (68.4%)    Subsample of 37 seropositive patients compared RT-qPCR & PCR  n = 37 samples  n = 22/37 (59%) CoV+  Days after onset: CoV+/Total  1–3 : 2/6 (33.3%)  4–6 : 10/15 (66.7%)  7–10: 10/16 (62.5%) | Samples collected within 10 days of disease onset.  Detection rate in stool increased as disease progressed  Method is unclear. | China |
| [(Chan et al., 2004)](http://sciwheel.com/work/citation?ids=1685388&pre=&suf=&sa=0) | Stool  Urine |  | n = 386 patients CoV+  Stool: 5/25 (20.0%) CoV+ before day 5 (serologically confirmed case)  Urine: 0/15 (0%) CoV+ before day 5 (serologically confirmed case)  n = 1/184 (<1%) CoV+ in presumed CoV- patients.  Stool  Samples up until day 5, 0% CoV+ (from graph)  Samples day 11-12 over 90% (348 samples) CoV+ (from graph)  Samples after day 30 approx 10% CoV+ (39 samples) (from graph)  Urine  Up to day 7, 0% CoV+  Day 7 - 8 under 10% CoV+  Day 11 - 12, >40% <50% CoV+  After day 30 approx 5% CoV+ | Data extracted from Figure. | China |
| [(Leung et al., 2003)](http://sciwheel.com/work/citation?ids=8538037&pre=&suf=&sa=0) | Stool |  | n = 124 patients  n = 20/124 (16.1%) CoV+  Viral RNA detected in stool up to 73 days (10 weeks) after onset of symptoms. |  | China |
| [(Hung et al., 2004)](http://sciwheel.com/work/citation?ids=8573637&pre=&suf=&sa=0) | Stool  Urine | Stool:  n = 94 samples  n= 82/94 (87.2%) CoV+ Mean viral load in log10 copies/mL (SD) n=82:  Stool: 7.0 (2.1)  -diarrhea: 7.5  -no diarrhea: 5  Urine:  n = 111 urine samples  n= 32/111 (28.8%) CoV+ Mean viral load in log10 copies/mL (SD), n=32:  Urine: 4.4 (1.3) | Stool:  n = 94 samples  n = 42/94 (44.7%) RT-PCR  Urine:  n = 111 urine samples  n = 29/111 (27%) RT-PCR  n = 1/20 (5%) CoV+culture | Day 10 to 15 after onset of symptoms | China |
| [(He et al., 2004)](http://sciwheel.com/work/citation?ids=8402044&pre=&suf=&sa=0) | Stool | Days after onset of fever: CoV+/total patients::  10-55d: 58/101 (57.4%)  10-19d: 8/8 (100%)  20-29d: 21/31 (67.7%)  30-39d: 27/57 (47.4%)  40-55d: 2/5 (40.0%) |  | Abstract only  Showed the viral load to be highest in the acute phase | China |
| [(Study group of SARS, 2004)](http://sciwheel.com/work/citation?ids=8657596&pre=&suf=&sa=0) | Stool  Urine | n = 531 samples from n = 177 SARS antibody positive patients  n = 26/177 (14.7%) positive in urine  n = 21/177 (11.9%) positive in stool  The quantity of SARS-CoV RNA in samples was 100-47,000 copies/ml  No significant difference was found among urine and stool. |  | Abstract only.  Convalescent Patients | China |
| [(Liu et al., 2004)](http://sciwheel.com/work/citation?ids=8402047&pre=&suf=&sa=0) | Stool |  | n = 56 patients, n = 514 stool samples  n= 56/56 patients CoV+ within the first 20 days.  4/56 (7.1%) CoV+ >100 days after disease onset.  The median (range) duration between onset of symptoms and first positive RT-PCR test result was 6 (3–10) days for stool.  Duration of virus excretion in stool  n = 27 (16-126) days. Duration was marked by the first of three consecutive negative tests for SARS-CoV RNA. | Coexisting illness or conditions were associated with longer viral excretion in stools.  Methods unclear. | China, France |
| [(Wong et al., 2003)](http://sciwheel.com/work/citation?ids=8499032&pre=&suf=&sa=0) | Stool |  | n = 4 patients  3/4 (75.0%) CoV+, Days 2 - 9 |  | China |
| [(Wang et al., 2005a)](http://sciwheel.com/work/citation?ids=8193414&pre=&suf=&sa=0) | Stool  Urine |  | n = 11 samples from active patients  n = 10 samples from recovered patients  Stool:  7/11 (63.6%) CoV+ in active infections  0/10 (0%) stool positive for viral RNA in recovered patients  Urine:  0/21 (0%) urine positive for viral RNA |  | China |

**Supplementary Table 2:** **Detection of SARS-CoV-2 from stool and urine.**

| Reference | Sample type: stool/urine/anal swab | CoV Detection (RT-qPCR)  (Data on length of shedding if available) | CoV Detection (RT-PCR)  (Data on length of shedding if available) | Notes | Country |
| --- | --- | --- | --- | --- | --- |
| [(Holshue et al., 2020)](http://sciwheel.com/work/citation?ids=8167980&pre=&suf=&sa=0) | Stool | n = 1 patient  100% CoV+ on day 6 after infection |  | First report of COVID in U.S. | USA |
| [(Wang et al., 2020)](http://sciwheel.com/work/citation?ids=8411087&pre=&suf=&sa=0) | Stool  Urine | Stool:  n = 153 specimens  44/153 (28.7%) CoV+  Urine:  n = 72 specimens  0/72 (0%) CoV+ |  | Ct <40 +ve result | China |
| [(Zhang et al., 2020a)](http://sciwheel.com/work/citation?ids=8415785&pre=&suf=&sa=0) | Stool |  | n = 14 patients  5/14 (35.7%) CoV+ |  | China |
| [(Tang et al., 2020)](http://sciwheel.com/work/citation?ids=8415671&pre=&suf=&sa=0) | Stool  Urine |  | n = 1 patient (Child)  Stool:  6/8 (75%) samples CoV+  Urine  0/1 (0%) samples CoV+  Day 1 after infection:  ORF1ab Ct 26.3; nucleoprotein Ct 27.6  Day 2  ORF1ab Ct 31.4; nucleoprotein Ct 30.6  Day 3:  ORF1ab Ct 27.0; nucleoprotein Ct 27.0 |  | China |
| [(Kam et al., 2020)](http://sciwheel.com/work/citation?ids=8404931&pre=&suf=&sa=0) | Stool  Urine | n = 1 patient (infant)  From day of admission to hospital  Stool, n=2  n=1/2 CoV+  Urine, n=1  n= 0-1 CoV+ |  |  | Singapore |
| [(Chen et al., 2020b)](http://sciwheel.com/work/citation?ids=8382681&pre=&suf=&sa=0) | Anal Swab | n = 28 patients  n = 11/28 (39.2%) CoV+  Day 10: Ct 24+39 |  |  | China |
| [(Ling et al., 2020)](http://sciwheel.com/work/citation?ids=8415787&pre=&suf=&sa=0) | Stool & Urine |  | n = 66 patients  Stool:  11/66 (16.7%) CoV+  43/55 (78.1%) CoV+ longer than in throat swabs (median 2.0 (1.0-4.0) days).  Urine:  4/58 (6.9%) CoV+  3/4 (75.0%) CoV+ after throat swabs turned negative | Methods are unclear | China |
| [(Young et al., 2020)](http://sciwheel.com/work/citation?ids=8373364&pre=&suf=&sa=0) | Stool  Urine | Stool:  4/8 (50.0%) patients CoV+  Urine:  0/8 (0%) CoV+ |  |  | Singapore |
| [(Xiao et al., 2020b)](http://sciwheel.com/work/citation?ids=8439845&pre=&suf=&sa=0) | Stool |  | n = 71 patients  Stool:  n = 39/71 (53.4%) CoV+  17/39 (43.6%) remained positive after showing negative respiratory results. |  | China |
| [(Xu et al., 2020)](http://sciwheel.com/work/citation?ids=8419628&pre=&suf=&sa=0) | Anal Swab | n = 10 children,  8/10 children CoV+ in stool  Rectal swabs remained CoV+ until day 27 on average |  |  | China, USA |
| [(Zhang et al., 2020a)](http://sciwheel.com/work/citation?ids=8415785&pre=&suf=&sa=0) | Stool |  | n = 14 patients  Stool:  5/14 (35.7%) CoV+ | When CoV- stool samples, also CoV- for oropharyngeal swabs. | China |
| [(Xing et al., 2020)](http://sciwheel.com/work/citation?ids=8498743&pre=&suf=&sa=0) | Stool | n = 3 patients (children)  Patients 1 and 2:  Pt 1: CoV+ day 4 to 23 inclusive  Pt 2: CoV+ day 4 to 33 inclusive  Pt 1: discharge day 27  Pt 2: discharge day 26  Patient 3:  Pt 3: CoV+ day 25 to 30 after admission. |  | PREPRINT | China |
| [(Kujawski et al., 2020)](http://sciwheel.com/work/citation?ids=8496314&pre=&suf=&sa=0) | Stool  Urine | n = 10 patients  Stool:  n = 7/10 (70.0%) CoV+  Most CoV+ when CoV+ in respiratory tract.  CoV+ up to day 25 (Median 14 days)  Urine:  n = 0/10 (0%) urine CoV+ |  | PREPRINT  First 12 positive patients in US  Serial testing to determine duration RNA detection and viral shedding ongoing. | USA |
| [(Wölfel et al., 2020)](http://sciwheel.com/work/citation?ids=8551661&pre=&suf=&sa=0) | Stool  Urine | n = 9 patients  Stool:  n=59 samples  9/9 (100%) patients CoV+  57/59 CoV+ samples  Last CoV+ swab day 28  Urine:  n = 0/27 (0%) samples CoV+  (From Graph) |  | PREPRINT  Stool and sputum samples RNA CoV+ over three weeks in 6/9 patients in spite of full resolution of symptoms.  Methods state RT-PCR was used, but quantification was presented indicating RT-qPCR  Data extracted from Figure. | Germany, UK |
| [(Wu et al., 2020b)](http://sciwheel.com/work/citation?ids=8496310&pre=&suf=&sa=0) | Stool | n = 10 children, Serologically CoV+  Stool  n = 8/10 (80.0%) patients CoV+ |  | PREPRINT | China |
| [(Cai et al., 2020)](http://sciwheel.com/work/citation?ids=8419966&pre=&suf=&sa=0) | Stool (method unstated)  Urine | n = 6 children 3 - 5 days after illness onset  Stool:  5/6 (83.3%) patients CoV+  Urine:  0/6 (0%) CoV+ |  | PREPRINT | China |
| [(Chan et al., 2020)](http://sciwheel.com/work/citation?ids=8133898&pre=&suf=&sa=0) | Stool  Urine |  | n = 3 patients  Stool:  0/3 (0%) patients CoV+  Urine:  0/3 (0%) patients CoV+ |  | China |
| [(Zhang et al., 2020b)](http://sciwheel.com/work/citation?ids=8694830&pre=&suf=&sa=0) | Stool  Urine | Stool:  n = 12 patients, n = 51 samples  10/12 (83.3%) patients CoV+ stool  2/23 (8.7%) patients CoV+ 16 and 21 days after hosp.admission.  Median Duration of Shedding  22 days fecal  Urine:  n = 23 patients  2/23 (8.7%) CoV+ |  | PREPRINT  Results were unclear. | China |
| [(Lo et al., 2020)](http://sciwheel.com/work/citation?ids=8546479&pre=&suf=&sa=0) | Stool & Urine | n = 10 patients  Stool samples  46/79 (58%) CoV+  Patient 1: 1/8 (12.5%) CoV+  Patient 2: 7/10 (70.0%) CoV+  Patient 3: 4/6 (66.7%) CoV+  Patient 4: 3/3 (100%) CoV+  Patient 5: 5/8 (62.5%) CoV+  Patient 6: 4/6 (66.7%) +1 inconclusive CoV+  Patient 7: 5/8 (62.5%) +1 inconclusive CoV+  Patient 8: 6/8 (75.0%) CoV+  Patient 9: 10/10 (100%) CoV+  Patient 10: 1/12 (8.3%) +9 inconclusive CoV+  Ct <= 35 is positive test  Ct > 38 negative test  Ct 36 to 38 required confirmation by retesting and was reported as inconclusive.  Urine:  n=0/49 (0%) CoV+ |  |  | China |
| [(Lescure et al., 2020)](http://sciwheel.com/work/citation?ids=8527129&pre=&suf=&sa=0) | Stool  Urine | n = 2 patients  Stool:  Patient 4: viral load max 6.8 log10 copies/g  Patient 5: viral load max 8.1 log10 copies/g | n = 5 patients  Stool:  n = 2/5 patients CoV+  n = 11/22 (50%) samples CoV+  Patient 1: 0/6 (0%) CoV+  Patient 2: 0/1 (0%) CoV+  Patient 3: 0/4 (0%) CoV+  Patient 4: 6/6 (100%) CoV+  Patient 5: 5/5 (100%) CoV+  Urine:  0/5 (0%) Patients CoV+  n = 0/13 (0%) samples CoV+ | PREPRINT  RT-PCR used as a screening test followed by RT-qPCR for testing viral loading | France |
| [(Chen et al., 2020a)](http://sciwheel.com/work/citation?ids=8622610&pre=&suf=&sa=0) | Stool | n = 19 patients, n = 74 faecal samples  Stool samples taken after first negative pharyngeal/sputum sample  n = 13/19 (68.4%) patients CoV+  n = 18/74 (24.3%) samples CoV+  Patient 1: 1/2 (20.0%)  Patient 2: 1/4 (25.0%)  Patient 3: 1/7 (14.3%)  Patient 4: 1/6 (16.7%)  Patient 5: 1/3 (33.3%)  Patient 6: 2/3 (66.6%)  Patient 7: 2/8 (25.0%)  Patient 8: 1/2 (50%)  Patient 9: 0/3 (0.0%)  Patient 10: 0/2 (0.0%)  Patient 11: 1/6 (16.7%)  Patient 12: 0/6 (0.0%)  Patient 13: 0/5 (0.0%)  Patient 14: 0/2 (0.0%)  Patient 15: 0/2 (0.0%)  Patient 16-18: N/A  Patient 19: 2/2 (100%)  Patient 20: 1/1 (100%)  Patient 21: 1/2 (50%)  Patient 22: 3/3 (100%) |  | Low detection in stool due to sample collection following first CoV- pharyngeal or sputum test. | China |
| [(Wu et al., 2020c)](http://sciwheel.com/work/citation?ids=8496740&pre=&suf=&sa=0) | Stool | n = 98 patients CoV+ (nasopharyngeal)  Stool  n = 41/74 (55.4%) patients CoV+  Nasopharyngeal CoV+ mean 16.7 days  Stool CoV+ mean 27.9 days |  | CORRESPONDENCE  Fecal samples CoV+ after NP samples CoV- | China, USA |
| [(Pan et al., 2020)](http://sciwheel.com/work/citation?ids=8527116&pre=&suf=&sa=0) | Stool | Stool  n = 17 patients (Day 0-13 post onset)  9/17 (52.9%) CoV+  550 copies to 1.21 x 10^5 copies/ml |  | CORRESPONDENCE  Data fairly sparse. No methodology | China |
| [(Zhang et al., 2020c)](http://sciwheel.com/work/citation?ids=8389981&pre=&suf=&sa=0) | Anal Swab | n =15 patients after 0 days treatment 4/15 (27%) CoV+ by RT-qPCR  Ct  Patient 3: 19.5  Patient 4: 30.2  Patient 5: 33.1  Patient 9: 33.6  n= 16 patients after 10 days treatment (day 5)  9/16 CoV+ by RT-qPCR  Ct  Patient 5: 33.1  Patient 6: 31.4  Patient 7: 30.2  Patient 8: 33.1  Patient 10: 23.8  Patient 13: 17.8  Patient 14: 25.5  Patient 15: 30.0  Patient 16: 27.5 |  |  | China |
| [(Zheng et al., 2020)](http://sciwheel.com/work/citation?ids=8753120&pre=&suf=&sa=0) | Stool  Urine |  | n = 96 patients CoV+  Stool  n = 55/93 (59%) CoV+  Urine  n = 1/67 (0.1%) CoV+ | CoV+ if Ct threshold <= 38.0  Median duration virus in stool 22 days  Median duration virus in resp 18 days  CoV+ in urine in severe case only | China |
| [(Xiao et al., 2020a)](http://sciwheel.com/work/citation?ids=8918645&pre=&suf=&sa=0) | Stool | n = 28 patients  n = 12/28 CoV+  One patient from the 28 Ct |  |  | China |

**Supplementary Table 3: Culture of SARS-CoV-1 from stool/urine or wastewater.**

| Reference | Sample type: stool/urine/anal swab | SARS-CoV-1 culture | Notes | Country |
| --- | --- | --- | --- | --- |
| [(Leung et al., 2003)](http://sciwheel.com/work/citation?ids=8538037&pre=&suf=&sa=0) | Stool | Undefined number of attempts to culture. None were successful. |  | China |
| [(Wang et al., 2005c)](http://sciwheel.com/work/citation?ids=8280380&pre=&suf=&sa=0) | Spiked Stool  Urine  Wastewater | Positive Virus Detection:  Temp = 20C  309th Hospital wastewater: 2d (n = 3/9 (33.3%) samples CoV+)  Domestic sewage: 2d (n = 3/9 (33.3%) samples CoV+)  Temp = 4C  309th Hospital wastewater: 14d (n = 9/9 (100%) samples CoV+)  Domestic sewage: 14d (n = 9/9 (100%) samples CoV+)  Temp = 20C  Stool: 3d (n = 9/30 (30.0%) samples CoV+)  Urine: 17d (n = 20/20 (100%) samples CoV+) |  | China |
| [(Hung et al., 2004)](http://sciwheel.com/work/citation?ids=8573637&pre=&suf=&sa=0) | Stool  Urine | Stool:  n = 1/20 (5.0%) CoV+ culture stool  Urine:  n = 1/20 (5.0%) CoV+ culture urine |  | China |
| [(Liu et al., 2004)](http://sciwheel.com/work/citation?ids=8402047&pre=&suf=&sa=0) | Stool | n = 0/12 (0%) CoV+ isolation from RT-PCR–positive stool specimens > 6 weeks after disease onset. |  | China, France |
| [(Wang et al., 2005b)](http://sciwheel.com/work/citation?ids=8280332&pre=&suf=&sa=0) | Sewage | “All sewage samples tested for the presence of infectious SARS-CoV in cell culture were negative” | Methods not detailed enough. | China |
| [(Wang et al., 2004)](http://sciwheel.com/work/citation?ids=8286625&pre=&suf=&sa=0) | Sewage  2 x Hospital | n = 12 samples  0/12 (0%) CoV+ infectious virus | Chinese paper, English abstract | China |
| [(Wang et al., 2005d)](http://sciwheel.com/work/citation?ids=8280340&pre=&suf=&sa=0) | Sewage: Hospital | Temp: 4C  CoV+ infectious virus: 14 days (n = 9/9 (100%) samples CoV+)  Temp: 20C  CoV+ infectious virus: 2 days (n = 3/9 (33.3%) samples CoV+) | CoV+ RNA detection in 20C samples for 8 days. | China |
| [(Wang et al., 2005a)](http://sciwheel.com/work/citation?ids=8193414&pre=&suf=&sa=0) | Stool  Urine  Sewage | n = 21 samples  n = 11 samples from active patients  n = 10 samples from recovered patients  0/21 Stool positive for infectious SARS-CoV-1  0/21 Urine positive for infectious SARS-CoV-1  n = 12 sewage samples (over 7 days and 2 hospitals)  0/12 sewage samples positive for infectious SARS-CoV-1 | Methodology not clear | China |

**Supplementary Table 4: Culture of SARS-CoV-2 from stool/urine or wastewater.**

| Reference | Sample type | CoV culture | Notes | Country |
| --- | --- | --- | --- | --- |
| [(Zhang et al., 2020d)](http://sciwheel.com/work/citation?ids=8573292&pre=&suf=&sa=0) | Stool | n = 1 patient  100% CoV+ | First paper to demonstrate recovery of infectious virus from stool. Electron microscopy verification. | China |
| [(Wölfel et al., 2020)](http://sciwheel.com/work/citation?ids=8551661&pre=&suf=&sa=0) | Anal swab | n = 13 samples from n = 4 patients over 6 - 12 weeks  0/13 (0%) CoV-2+ | Samples containing <10^6 copies/mL (or copies per sample) never yielded an isolate.  However, CoV+ cultures obtained from oral or nasopharyngeal swabs (16.7%) and sputum (83.3%) | Germany, UK |
| [(Wang et al., 2020)](http://sciwheel.com/work/citation?ids=8411087&pre=&suf=&sa=0) | Stool | n = 4 patients  2/4 (50%) CoV-2+ | Verified intact virus by electron microscope | China |
| [(Sun et al., 2020)](http://sciwheel.com/work/citation?ids=8826865&pre=&suf=&sa=0) | Urine | n = 1 patient  1/1 (100%) CoV-2+ | CoV+ on day 12 post infection up until day 42. RT-PCR positive urine specimens (Ct 34) from day 12 p.i. was serially diluted in infection media and inoculated onto Vero E6 cells. Cytopathic effects were clearly observed after 3 days. | China |
| [(Rimoldi et al., 2020)](http://sciwheel.com/work/citation?ids=8919994&pre=&suf=&sa=0) | 3 x WWTW (Influent and Effluent)  2 x Rivers  (WWTW A & B discharge to Lambro River  WWTW C discharges to Lambro Meridionale River) | n = 16 samples (Over two different days)  0/16 (0%) CoV-2+ | PREPRINT  No positive cultures detected 48 and 72 hrs after inoculation. | Italy |
| [(Xiao et al., 2020a)](http://sciwheel.com/work/citation?ids=8918645&pre=&suf=&sa=0) | Stool | n = 3 patients  2/3 cultures CoV+ | Detection of virus particles using transmission electron microscopy after 72 hours | China |

**Supplementary Table 5:** **Detection of SARS-CoV-1 from wastewater.**

| Reference | Wastewater Source1 | Method of CoV detection | CoV Detection | Notes | Country |
| --- | --- | --- | --- | --- | --- |
| [(Wang et al., 2005c)](http://sciwheel.com/work/citation?ids=8280380&pre=&suf=&sa=0) | Hospital wastewater  Domestic sewage | RT-PCR | Temp: 20C  1x Hospital wastewater CoV+  1 x Domestic sewage  CoV+ |  | China |
| [(Wang et al., 2005b)](http://sciwheel.com/work/citation?ids=8280332&pre=&suf=&sa=0) | 2 x Hospitals  1 x Housing estate | RT PCR | Confirmed presence of CoV+ in hospital sewage | Methods/Results unclear | China |
| [(Wang et al., 2004)](http://sciwheel.com/work/citation?ids=8286625&pre=&suf=&sa=0) | Hospital sewage | RT-PCR | n = 12/12 (100%) | 1/10 positive in sewage after disinfection | China |
| [(Wang et al., 2005d)](http://sciwheel.com/work/citation?ids=8280340&pre=&suf=&sa=0) | 2 x Hospitals | RT-PCR | Confirmed presence of CoV+ in hospital sewage | Methods/Results unclear | China |

1 Description of the nature of the dataset collected: virus spiked into lab-created wastewater (i.e., Lab) or natural abundance of CoV in wastewater collected from plumbing/wastewater/river (i.e., Environment).

**Supplementary Table 6: Detection of SARS-CoV-2 from wastewater**

| Reference | Wastewater Source1 | Method of CoV Detection | CoV Detection | Notes | Country |
| --- | --- | --- | --- | --- | --- |
| [(Wu et al., 2020a)](http://sciwheel.com/work/citation?ids=8622602&pre=&suf=&sa=0) | WWTP x 1 (From two catchments) | RT-qPCR | n = 10/14 (71.4%) samples  7/10 hitting all three primers with an average Ct for all samples below 40 | Post 1st US SARS-CoV-2 case | USA, Singapore |
| [(Ahmed et al., 2020)](http://sciwheel.com/work/citation?ids=8714792&pre=&suf=&sa=0) | 2 x WWTP (A & B)  1 x Pumping station | RT-qPCR | n = 9 wastewater samples tested (WWTP A,B; Pumping Station)  n = 2/9 (22.2 %) samples WWTP B CoV+  Pumping station and WWTP A CoV- |  | USA, Australia, Japan |
| [(Medema et al., 2020a)](http://sciwheel.com/work/citation?ids=8573247&pre=&suf=&sa=0) and [(Medema et al., 2020b)](http://sciwheel.com/work/citation?ids=8971090&pre=&suf=&sa=0) | 7 x WWTP in 5 cities (2 large and 3 medium size)  1 x airport | RT-PCR | 3 weeks prior to epidemic:  0/6 CoV+  Week 1 of epidemic:  n = 4/6 (66.6%) CoV+  Week 3 of epidemic:  n = 6/7 (85.7%) CoV+  Detection varied by primer:  n = 5/7 (71.4%) CoV+ N3  n = 4/7 (57.1%) CoV+ E primer/probe |  | The Netherlands |
| [(Wurtzer et al., 2020)](http://sciwheel.com/work/citation?ids=8733257&pre=&suf=&sa=0) | 3 x WWTP (Parisian area) | RT- qPCR | n = 23/23 (100%) raw sewage CoV+  n = 6/8 (75%) treated sewage CoV+ | PREPRINT  CoV+ quantity in WWTP effluent is 100 x lower than influent. | France |
| [(Nemudryi et al., 2020)](http://sciwheel.com/work/citation?ids=8750435&pre=&suf=&sa=0) | 1 x WWTP influent | RT-PCR  RT-qPCR | n = 7 sampling days over 17 days  5/5 (100%) CoV+ composite sampling days  Viral abundance:  N1: 100 to 1700 viral genomes/L  N2: 100 to 500 viral genomes/L  2/2 CoV+ grab sampling days  Viral abundance:  N1: 8,000 to 9,000 viral genomes/L  N2: 9,0000 to 23,000 | PREPRINT  SARS-CoV-2 detected over the entire time course. Viral RNA (N1) steadily decreased over the last week.  Viral genomes/L deduced from Figure. | USA |
| [(Randazzo et al., 2020)](http://sciwheel.com/work/citation?ids=8784925&pre=&suf=&sa=0) | 6 x WWTP in two cities  Influent  Secondary Treatment  Tertiary Treatment | RT-qPCR | n = 42 influent samples  n = 18 secondary treatment samples  n = 12 tertiary treatment samples  Untreated wastewater:  5.29log genomic copies/l  Influent:  n = 36/42 (85.7%) CoV+  12% samples CoV+ Ct 37 - 40  29% samples CoV+ Ct 34 - 37  Secondary /Tertiary treatment  n =0/42 (0%) CoV+ (Ct <40) | PREPRINT | Spain |
| [(La Rosa et al., 2020)](http://sciwheel.com/work/citation?ids=8802710&pre=&suf=&sa=0) | 2 x WWTPs in Milan  1 x WWTP in Rome | RT-PCR | n = 12 composite influent  6/12 (50%) CoV+ | PREPRINT | Italy |
| [(Bar Or et al., 2020)](http://sciwheel.com/work/citation?ids=8868998&pre=&suf=&sa=0) | 17 x WWTW (Influent)  2 x Hospital Effluent (In sewer)  3 x Isolation facilities (In sewer) | RT-qPCR | n = 17 WWTW samples (influent)  3/17 (17.6%) CoV+ (Ct <40)  (Ct = 38.5, 34.7, 37.0)  n = 2 Hospital sewer network  1/2 CoV+ (Ct<40)  (Ct = 33.2)  n = 4 Sewer network  3/4 CoV+ (Ct<40)  (Ct 37.24, 35.57, 33.75)  n = 3 Isolation facilities sewer network  3/3 CoV+ (Ct<40)  (Ct 38.03, 35.51, 32.76) | PREPRINT | Israel |
| [(Alpaslan Kocamemi et al., 2020a)](http://sciwheel.com/work/citation?ids=8869010&pre=&suf=&sa=0) | 7 X WWTW (Influent)  2 x Manholes | RT-qPCR | n = 5/7 (71.4%) WWTW CoV+  (Cq 38.37, 37.23, 38.82, 39.18, 39.54)  n = 2/2 Manholes CoV+  (Cq 35.91, 34.67)  n = 5/7 (71.4%) WWTW Viral genome detected (titre/l)  8.26 E+03  1.80 E+04  4.95 E+03  3.73 E+03  2.89 E+03  n = 2/2 Manholes Viral genome detected (titre/l)  4.49 E+04  9.33 E+04 | PREPRINT  SARS-CoV-2 titres greater in manhole sewage to that for WWTW | Turkey |
| [(Lodder and de Roda Husman, 2020)](http://sciwheel.com/work/citation?ids=8566238&pre=&suf=&sa=0) | 1 x WWTW | RT-qPCR | n = unknown. At least 3  Weekly 24hr samples  n= 1/3 CoV+ | CORRESPONDENCE  No methodology  Wastewater sample CoV+ve 4 days after 1st CoV+ person in NL | The Netherlands |
| [(Alpaslan Kocamemi et al., 2020b)](http://sciwheel.com/work/citation?ids=8917517&pre=&suf=&sa=0) | 7 x WWTW (2 Primary Sludge; 7 Waste Activated Sludge) | RT-qPCR  Copy Numbers of Genome | n = 2/2 Primary Sludge CoV+  (Cq 35.96, 34.71)  n = 7/7 Waste Activated Sludge CoV+ (Cq 35.67, 35.00, 34.98, 34.74, 34.61, 34.11, 33.52)  Primary Sludge Viral genome detected (titre/l)  1.41E+03  8.60E+02  Waste Activated Sludge Viral genome detected (titre/l)  1.17E+04  1.62E+04  1.64E+04  1.91E+04  1.95E+04  3.08E+04  4.02E+04 | PREPRINT | Turkey |
| [(Rimoldi et al., 2020)](http://sciwheel.com/work/citation?ids=8919994&pre=&suf=&sa=0) | 3 x WWTW (Influent and Effluent)  2 x Rivers  (WWTW A & B discharge to Lambro River  WWTW C discharges to Lambro Meridionale River) | RT-qPCR | 1st Day Sampling  n = 3/3 CoV+ Raw Sewage  n = 0/3 CoV+ Treated Sewage  n = 2/2 CoV+ River Samples (Lambro and Lambro Meridonale Rivers)  2nd Day Sampling  n = 1/3 CoV+ Raw Sewage *(CoV+ From WWTW B which discharges to Lambro River)*  n = 0/3 CoV+ Treated Sewage  n = 1/2 CoV+ River Samples  *(Lambro River)* | PREPRINT  No Cq results  Second day sampling raw and river samples CoV+ for discharge from WWTW B to Lambro River | Italy |
| [(Peccia et al., 2020)](http://sciwheel.com/work/citation?ids=8946881&pre=&suf=&sa=0) | Primary Sludge  1 x WWTW | RT-qPCR | n = 36 samples taken over 36 days  n = 36/36 (100%) CoV+ | PREPRINT  Solids content of sludge - 2.6 - 5%  Over 96.5% all CoV+ samples Ct less than 38  Ct 38 - 40 deemed CoV+ only if detection occurred with virus nucleocapsids N1 and N2 primer sets and both replicates. | USA |

[References](http://sciwheel.com/work/bibliography)

Ahmed, W., Angel, N., Edson, J., Bibby, K., Bivins, A., O’Brien, J. W., Choi, P. M., Kitajima, M., Simpson, S. L., Li, J., et al. (2020). First confirmed detection of SARS-CoV-2 in untreated wastewater in Australia: A proof of concept for the wastewater surveillance of COVID-19 in the community. Sci. Total Environ. 728, 138764. doi:10.1016/j.scitotenv.2020.138764.

Alpaslan Kocamemi, B., Kurt, H., Hacioglu, S., Yarali, C., Saatci, A. M., and Pakdemirli, B. (2020a). First Data-Set on SARS-CoV-2 Detection for Istanbul Wastewaters in Turkey. medRxiv. doi:10.1101/2020.05.03.20089417.

Alpaslan Kocamemi, B., Kurt, H., Sait, A., Sarac, F., Saatci, A. M., and Pakdemirli, B. (2020b). SARS-CoV-2 Detection in Istanbul Wastewater Treatment Plant Sludges. medRxiv. doi:10.1101/2020.05.12.20099358.

Bar Or, I., Yaniv, K., Shagan, M., Ozer, E., Erster, O., Mendelson, E., Mannasse, B., Shirazi, R., Kramarsky-Winter, E., Nir, O., et al. (2020). Regressing SARS-CoV-2 sewage measurements onto COVID-19 burden in the population: a proof-of-concept for quantitative environmental surveillance. medRxiv. doi:10.1101/2020.04.26.20073569.

Cai, J., Xu, J., Lin, D., Yang, Z., Xu, L., Qu, Z., Zhang, Y., Zhang, H., Jia, R., Liu, P., et al. (2020). A Case Series of children with 2019 novel coronavirus infection: clinical and epidemiological features. Clin. Infect. Dis. doi:10.1093/cid/ciaa198.

Chan, J. F.-W., Yuan, S., Kok, K.-H., To, K. K.-W., Chu, H., Yang, J., Xing, F., Liu, J., Yip, C. C.-Y., Poon, R. W.-S., et al. (2020). A familial cluster of pneumonia associated with the 2019 novel coronavirus indicating person-to-person transmission: a study of a family cluster. Lancet 395, 514–523. doi:10.1016/S0140-6736(20)30154-9.

Chan, K. H., Poon, L. L. L. M., Cheng, V. C. C., Guan, Y., Hung, I. F. N., Kong, J., Yam, L. Y. C., Seto, W. H., Yuen, K. Y., and Peiris, J. S. M. (2004). Detection of SARS coronavirus in patients with suspected SARS. Emerging Infect. Dis. 10, 294–299. doi:10.3201/eid1002.030610.

Chen, C., Gao, G., Xu, Y., Pu, L., Wang, Q., Wang, L., Wang, W., Song, Y., Chen, M., Wang, L., et al. (2020a). SARS-CoV-2-Positive Sputum and Feces After Conversion of Pharyngeal Samples in Patients With COVID-19. Ann. Intern. Med. doi:10.7326/M20-0991.

Chen, W., Lan, Y., Yuan, X., Deng, X., Li, Y., Cai, X., Li, L., He, R., Tan, Y., Deng, X., et al. (2020b). Detectable 2019-nCoV viral RNA in blood is a strong indicator for the further clinical severity. Emerg. Microbes Infect. 9, 469–473. doi:10.1080/22221751.2020.1732837.

He, Z., Dong, Q., Song, S., He, L., and Zhuang, H. (2004). Detection for severe acute respiratory syndrome (SARS) coronavirus RNA in stool of SARS patients. Zhonghua Yu Fang Yi Xue Za Zhi 38, 90–91.

Holshue, M. L., DeBolt, C., Lindquist, S., Lofy, K. H., Wiesman, J., Bruce, H., Spitters, C., Ericson, K., Wilkerson, S., Tural, A., et al. (2020). First case of 2019 novel coronavirus in the united states. N. Engl. J. Med. 382, 929–936. doi:10.1056/NEJMoa2001191.

Hung, I. F. N., Cheng, V. C. C., Wu, A. K. L., Tang, B. S. F., Chan, K. H., Chu, C. M., Wong, M. M. L., Hui, W. T., Poon, L. L. M., Tse, D. M. W., et al. (2004). Viral loads in clinical specimens and SARS manifestations. Emerging Infect. Dis. 10, 1550–1557. doi:10.3201/eid1009.040058.

Kam, K.-Q., Yung, C. F., Cui, L., Lin Tzer Pin, R., Mak, T. M., Maiwald, M., Li, J., Chong, C. Y., Nadua, K., Tan, N. W. H., et al. (2020). A Well Infant with Coronavirus Disease 2019 (COVID-19) with High Viral Load. Clin. Infect. Dis. doi:10.1093/cid/ciaa201.

Kujawski, S. A., Wong, K. K., Collins, J. P., Epstein, L., Killerby, M. E., Midgley, C. M., Abedi, G. R., Ahmed, N. S., Almendares, O., Alvarez, F. N., et al. (2020). First 12 patients with coronavirus disease 2019 (COVID-19) in the United States. medRxiv. doi:10.1101/2020.03.09.20032896.

La Rosa, G., Iaconelli, M., Mancini, P., Bonanno Ferraro, G., Veneri, C., Bonadonna, L., and Lucentini, L. (2020). First detection of sars-cov-2 in untreated wastewaters in italy. medRxiv. doi:10.1101/2020.04.25.20079830.

Lescure, F.-X., Bouadma, L., Nguyen, D., Parisey, M., Wicky, P.-H., Behillil, S., Gaymard, A., Bouscambert-Duchamp, M., Donati, F., Le Hingrat, Q., et al. (2020). Clinical and virological data of the first cases of COVID-19 in Europe: a case series. Lancet Infect. Dis. doi:10.1016/S1473-3099(20)30200-0.

Leung, W. K., To, K.-F., Chan, P. K. S., Chan, H. L. Y., Wu, A. K. L., Lee, N., Yuen, K. Y., and Sung, J. J. Y. (2003). Enteric involvement of severe acute respiratory syndrome-associated coronavirus infection. Gastroenterology 125, 1011–1017. doi:10.1016/s0016-5085(03)01215-0.

Ling, Y., Xu, S.-B., Lin, Y.-X., Tian, D., Zhu, Z.-Q., Dai, F.-H., Wu, F., Song, Z.-G., Huang, W., Chen, J., et al. (2020). Persistence and clearance of viral RNA in 2019 novel coronavirus disease rehabilitation patients. Chin. Med. J. doi:10.1097/CM9.0000000000000774.

Liu, W., Tang, F., Fontanet, A., Zhan, L., Zhao, Q.-M., Zhang, P.-H., Wu, X.-M., Zuo, S.-Q., Baril, L., Vabret, A., et al. (2004). Long-term SARS coronavirus excretion from patient cohort, China. Emerging Infect. Dis. 10, 1841–1843. doi:10.3201/eid1010.040297.

Lodder, W., and de Roda Husman, A. M. (2020). SARS-CoV-2 in wastewater: potential health risk, but also data source. Lancet Gastroenterol. Hepatol. doi:10.1016/S2468-1253(20)30087-X.

Lo, I. L., Lio, C. F., Cheong, H. H., Lei, C. I., Cheong, T. H., Zhong, X., Tian, Y., and Sin, N. N. (2020). Evaluation of SARS-CoV-2 RNA shedding in clinical specimens and clinical characteristics of 10 patients with COVID-19 in Macau. Int. J. Biol. Sci. 16, 1698–1707. doi:10.7150/ijbs.45357.

Medema, G., Heijnen, L., Elsinga, G., and Italiaander, R. (2020a). Presence of SARS-Coronavirus-2 in Sewage. Available at: https://www.medrxiv.org/content/10.1101/2020.03.29.20045880v1.full.pdf [Accessed April 5, 2020].

Medema, G., Heijnen, L., Elsinga, G., Italiaander, R., and Brouwer, A. (2020b). Presence of SARS-Coronavirus-2 RNA in Sewage and Correlation with Reported COVID-19 Prevalence in the Early Stage of the Epidemic in The Netherlands. Environ. Sci. Technol. Lett. doi:10.1021/acs.estlett.0c00357.

Nemudryi, A., Nemudraia, A., Surya, K., Wiegand, T., Buyukyoruk, M., Wilkinson, R., and Wiedenheft, B. (2020). Temporal detection and phylogenetic assessment of SARS-CoV-2 in municipal wastewater. medRxiv. doi:10.1101/2020.04.15.20066746.

Pan, Y., Zhang, D., Yang, P., Poon, L. L. M., and Wang, Q. (2020). Viral load of SARS-CoV-2 in clinical samples. Lancet Infect. Dis. 20, 411–412. doi:10.1016/S1473-3099(20)30113-4.

Peccia, J., Zulli, A., Brackney, D. E., Grubaugh, N. D., Kaplan, E. H., Casanovas-Massana, A., Ko, A. I., Malik, A. A., Wang, D., Wang, M., et al. (2020). SARS-CoV-2 RNA concentrations in primary municipal sewage sludge as a leading indicator of COVID-19 outbreak dynamics. medRxiv. doi:10.1101/2020.05.19.20105999.

Peiris, J. S. M., Chu, C. M., Cheng, V. C. C., Chan, K. S., Hung, I. F. N., Poon, L. L. M., Law, K. I., Tang, B. S. F., Hon, T. Y. W., Chan, C. S., et al. (2003). Clinical progression and viral load in a community outbreak of coronavirus-associated SARS pneumonia: a prospective study. Lancet 361, 1767–1772. doi:10.1016/s0140-6736(03)13412-5.

Poon, L. L. M., Chan, K. H., Wong, O. K., Cheung, T. K. W., Ng, I., Zheng, B., Seto, W. H., Yuen, K. Y., Guan, Y., and Peiris, J. S. M. (2004). Detection of SARS coronavirus in patients with severe acute respiratory syndrome by conventional and real-time quantitative reverse transcription-PCR assays. Clin. Chem. 50, 67–72. doi:10.1373/clinchem.2003.023663.

Randazzo, W., Truchado, P., Ferrando, E. C., Simon, P., Allende, A., and Sanchez, G. (2020). SARS-CoV-2 RNA titers in wastewater anticipated COVID-19 occurrence in a low prevalence area. medRxiv. doi:10.1101/2020.04.22.20075200.

Ren, Y., Ding, H., Wu, Q., Chen, W., Chen, D., Bao, Z., Yang, L., Zhao, C., and Wang, J. (2003). Detection of SARS-CoV RNA in stool samples of SARS patients by nest RT-PCR and its clinical value. Zhongguo Yi Xue Ke Xue Yuan Xue Bao 25, 368–371.

Rimoldi, S. G., Stefani, F., Gigantiello, A., Polesello, S., Comandatore, F., Mileto, D., Maresca, M., Longobardi, C., Mancon, A., Romeri, F., et al. (2020). Presence and vitality of SARS-CoV-2 virus in wastewaters and rivers. medRxiv. doi:10.1101/2020.05.01.20086009.

Study group of SARS (2004). Quantitative detection of SARS-CoV RNA in excreta and oropharyngeal washing fluid from convalescence patients with severe acute respiratory syndrome. Zhongguo Yi Xue Ke Xue Yuan Xue Bao 26, 251–254.

Sun, J., Zhu, A., Li, H., Zheng, K., Zhuang, Z., Chen, Z., Shi, Y., Zhang, Z., Chen, S.-B., Liu, X., et al. (2020). Isolation of Infectious SARS-CoV-2 from Urine of a COVID-19 Patient. Emerg. Microbes Infect., 1–8. doi:10.1080/22221751.2020.1760144.

Tang, A., Tong, Z.-D., Wang, H.-L., Dai, Y.-X., Li, K.-F., Liu, J.-N., Wu, W.-J., Yuan, C., Yu, M.-L., Li, P., et al. (2020). Detection of Novel Coronavirus by RT-PCR in Stool Specimen from Asymptomatic Child, China. Emerging Infect. Dis. 26, 1337–1339. doi:10.3201/eid2606.200301.

Vabret, A., Dina, J., Gouarin, S., Petitjean, J., Corbet, S., and Freymuth, F. (2006). Detection of the new human coronavirus HKU1: a report of 6 cases. Clin. Infect. Dis. 42, 634–639. doi:10.1086/500136.

Wang, W., Xu, Y., Gao, R., Lu, R., Han, K., Wu, G., and Tan, W. (2020). Detection of SARS-CoV-2 in Different Types of Clinical Specimens. JAMA. doi:10.1001/jama.2020.3786.

Wang, X.-W., Li, J.-S., Guo, T.-K., Zhen, B., Kong, Q.-X., Yi, B., Li, Z., Song, N., Jin, M., Wu, X.-M., et al. (2005a). Excretion and detection of SARS coronavirus and its nucleic acid from digestive system. World J. Gastroenterol. 11, 4390–4395. doi:10.3748/wjg.v11.i28.4390.

Wang, X.-W., Li, J.-S., Guo, T.-K., Zhen, B., Kong, Q.-X., Yi, B., Li, Z., Song, N., Jin, M., Xiao, W.-J., et al. (2005b). Concentration and detection of SARS coronavirus in sewage from Xiao Tang Shan Hospital and the 309th Hospital. J. Virol. Methods 128, 156–161. doi:10.1016/j.jviromet.2005.03.022.

Wang, X.-W., Li, J.-S., Guo, T.-K., Zhen, B., Kong, Q.-X., Yi, B., Li, Z., Song, N., Jin, M., Xiao, W.-J., et al. (2004). Detection of RNA of SARS coronavirus in hospital sewage. Zhonghua Yu Fang Yi Xue Za Zhi 38, 257–260.

Wang, X.-W., Li, J.-S., Jin, M., Zhen, B., Kong, Q.-X., Song, N., Xiao, W.-J., Yin, J., Wei, W., Wang, G.-J., et al. (2005c). Study on the resistance of severe acute respiratory syndrome-associated coronavirus. J. Virol. Methods 126, 171–177. doi:10.1016/j.jviromet.2005.02.005.

Wang, X. W., Li, J., Guo, T., Zhen, B., Kong, Q., Yi, B., Li, Z., Song, N., Jin, M., Xiao, W., et al. (2005d). Concentration and detection of SARS coronavirus in sewage from Xiao Tang Shan Hospital and the 309th Hospital of the Chinese People’s Liberation Army. Water Sci. Technol. 52, 213–221. doi:10.2166/wst.2005.0266.

Wölfel, R., Corman, V. M., Guggemos, W., Seilmaier, M., Zange, S., Müller, M. A., Niemeyer, D., Jones, T. C., Vollmar, P., Rothe, C., et al. (2020). Virological assessment of hospitalized patients with COVID-2019. Nature 581, 465–469. doi:10.1038/s41586-020-2196-x.

Wong, P.-N., Mak, S.-K., Lo, K.-Y., Tong, G. M. W., Wong, Y., Watt, C.-L., and Wong, A. K. M. (2003). Clinical presentation and outcome of severe acute respiratory syndrome in dialysis patients. Am. J. Kidney Dis. 42, 1075–1081. doi:10.1016/j.ajkd.2003.08.005.

Wurtzer, S., Marechal, V., Mouchel, J.-M., and Moulin, L. (2020). Time course quantitative detection of SARS-CoV-2 in Parisian wastewaters correlates with COVID-19 confirmed cases. medRxiv. doi:10.1101/2020.04.12.20062679.

Wu, F., Xiao, A., Zhang, J., Gu, X., Lee, W. L., Kauffman, K., Hanage, W., Matus, M., Ghaeli, N., Endo, N., et al. (2020a). SARS-CoV-2 titers in wastewater are higher than expected from clinically confirmed cases. medRxiv. doi:10.1101/2020.04.05.20051540.

Wu, Q., Xing, Y., Shi, L., Li, W., Gao, Y., Pan, S., Wang, Y., Wang, W., and Xing, Q. (2020b). Clinical Characteristics of 74 Children with Coronavirus Disease 2019. medRxiv. doi:10.1101/2020.03.19.20027078.

Wu, Y., Guo, C., Tang, L., Hong, Z., Zhou, J., Dong, X., Yin, H., Xiao, Q., Tang, Y., Qu, X., et al. (2020c). Prolonged presence of SARS-CoV-2 viral RNA in faecal samples. Lancet Gastroenterol. Hepatol. 5, 434–435. doi:10.1016/S2468-1253(20)30083-2.

Xiao, F., Sun, J., Xu, Y., Li, F., Huang, X., Li, H., Zhao, J., Huang, J., and Zhao, J. (2020a). Infectious SARS-CoV-2 in Feces of Patient with Severe COVID-19. Emerging Infect. Dis. 26. doi:10.3201/eid2608.200681.

Xiao, F., Tang, M., Zheng, X., Liu, Y., Li, X., and Shan, H. (2020b). Evidence for Gastrointestinal Infection of SARS-CoV-2. Gastroenterology 158, 1831-1833.e3. doi:10.1053/j.gastro.2020.02.055.

Xing, Y., Ni, W., Wu, Q., Li, W., Li, G., Tong, J., Song, X., and Xing, Q. (2020). Prolonged presence of SARS-CoV-2 in feces of pediatric patients during the convalescent phase. medRxiv. doi:10.1101/2020.03.11.20033159.

Xu, Y., Li, X., Zhu, B., Liang, H., Fang, C., Gong, Y., Guo, Q., Sun, X., Zhao, D., Shen, J., et al. (2020). Characteristics of pediatric SARS-CoV-2 infection and potential evidence for persistent fecal viral shedding. Nat. Med. 26, 502–505. doi:10.1038/s41591-020-0817-4.

Young, B. E., Ong, S. W. X., Kalimuddin, S., Low, J. G., Tan, S. Y., Loh, J., Ng, O.-T., Marimuthu, K., Ang, L. W., Mak, T. M., et al. (2020). Epidemiologic Features and Clinical Course of Patients Infected With SARS-CoV-2 in Singapore. JAMA. doi:10.1001/jama.2020.3204.

Zhai, J., Briese, T., Dai, E., Wang, X., pang, X., Du, Z., Liu, H., Wang, J., Wang, H., Guo, Z., et al. (2004). Real-time polymerase chain reaction for detecting SARS coronavirus, Beijing, 2003. Emerging Infect. Dis. 10, 300–303. doi:10.3201/eid1002.030799.

Zhang, J., Wang, S., and Xue, Y. (2020a). Fecal specimen diagnosis 2019 Novel Coronavirus-Infected Pneumonia. J. Med. Virol. doi:10.1002/jmv.25742.

Zhang, N., Gong, Y., Meng, F., Bi, Y., Yang, P., and Wang, F. (2020b). Virus shedding patterns in nasopharyngeal and fecal specimens of COVID-19 patients. medRxiv. doi:10.1101/2020.03.28.20043059.

Zhang, W., Du, R.-H., Li, B., Zheng, X.-S., Yang, X.-L., Hu, B., Wang, Y.-Y., Xiao, G.-F., Yan, B., Shi, Z.-L., et al. (2020c). Molecular and serological investigation of 2019-nCoV infected patients: implication of multiple shedding routes. Emerg. Microbes Infect. 9, 386–389. doi:10.1080/22221751.2020.1729071.

Zhang, Y., Chen, C., Zhu, S., Shu, C., Wang, D., Song, J., Song, Y., Zhen, W., Feng, Z., Wu, G., et al. (2020d). Isolation of 2019-nCoV from a Stool Specimen of a Laboratory- Confirmed Case of the Coronavirus Disease 2019 (COVID-19). CCDC Weekly 2.

Zheng, S., Fan, J., Yu, F., Feng, B., Lou, B., Zou, Q., Xie, G., Lin, S., Wang, R., Yang, X., et al. (2020). Viral load dynamics and disease severity in patients infected with SARS-CoV-2 in Zhejiang province, China, January-March 2020: retrospective cohort study. BMJ 369, m1443. doi:10.1136/bmj.m1443.
